# Supplementary material for: Anti-NT5c1A Autoantibodies as Biomarkers in Inclusion Body Myositis
Source: PubMed Central journal article supplement (PMC6465553; doi:10.3389/fimmu.2019.00745), 2019-04-09
Supplement: Data_Sheet_1.pdf [file Data_Sheet_1.pdf]

**Supplemental Figure 1:** Association between anti-NT5c1A antibody levels and muscle weakness. A.) Spearman correlation plot shows significant correlation between anti-NT5c1A antibody levels and muscle weakness ( $p=0.0178$ ). B.) Patients positive for anti-NT5c1A antibodies had more severe muscle weakness scored on a scale of 1-3 Newton metres ( $p=0.0356$ ). \*Anti-NT5C1A titers divided by 600 (MFU cutoff).

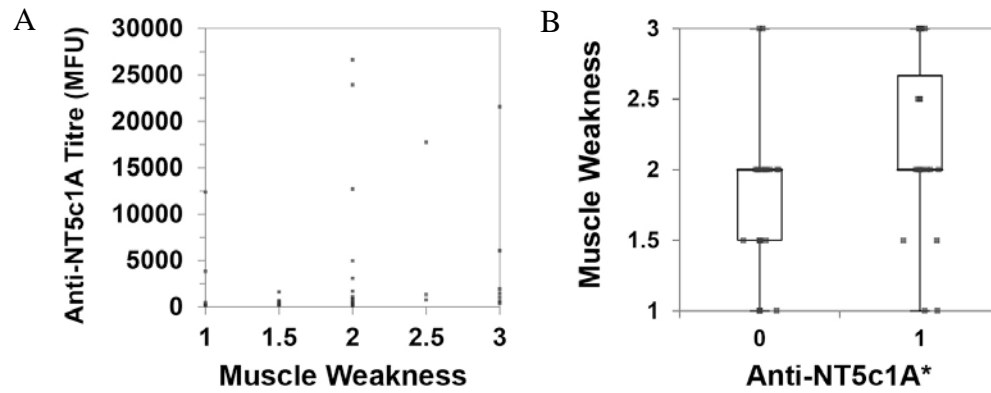

**Supplemental Table 1.** Data and calculations derived from six eligible publications used for Figure 1 forest plot\*.

| Authors (Year) [Reference]     | Immunoassay                                      | IBM (#) (n)      | Pooled Controls (#) (n) | OR           | OR-CI   | OR+CI   | Lower    | Upper     | Order |
|--------------------------------|--------------------------------------------------|------------------|-------------------------|--------------|---------|---------|----------|-----------|-------|
| Amlani et al (this study 2019) | ALBIA with full length human recombinant protein | 48.8% (21) (43)  | 8.3% (51) (615)         | 10.556<br>15 | 5.43919 | 20.4869 | 5.11696  | 9.93075   | 7     |
| Salajegheh et al (2011) [5]    | IB muscle lysate                                 | 52% (13) (25)    | 0% (0) (40)             | 87.75        | 4.84214 | 1590.22 | 82.90786 | 1502.47   | 6     |
| Pluk et al (2013) [4]          | IP of in vitro TnT protein                       | 33% (31) (94)    | 2.9% (5) (172)          | 16.434<br>92 | 6.11892 | 44.1428 | 10.316   | 27.70788  | 5     |
| Herbert et al (2016) [9]       | ELISA 3 peptides representing major epitopes     | 37% (88) (238)   | 3.5% (16) (458)         | 16.206<br>67 | 9.22086 | 28.485  | 6.98581  | 12.27833  | 4     |
| Lloyd et al (2016) [10]        | WB of lysates from transfected HEK cells         | 60.6% (71) (117) | 13.3% (51) (383)        | 10.047<br>74 | 6.2559  | 16.1379 | 3.79184  | 6.09016   | 3     |
| Tawara et al (2017) [10]       | CBA transfected COS cells                        | 35.8% (24) (67)  | 8.3% (13) (157)         | 6.1824<br>69 | 2.90285 | 13.1674 | 3.279619 | 6.984931  | 2     |
| Muro et al (2017) [13]         | ELISA with IP                                    | 80% (8) (10)     | 7.6% (27) (356)         | 48.740<br>74 | 9.8564  | 241.027 | 38.88434 | 192.28626 | 1     |

\* See Table 1 for more details

**Abbreviations:** ALBIA, addressable laser bead immunoassay; CBA, cell based assay; CI, confidence interval; COS, CV-1 in Origin with SV40 genetic material; ELISA, enzyme linked immunosorbent assay; HEK, human embryonic kidney; IB, immunoblot; IBM, inclusion body myositis; IP, immunoprecipitation; JIA, juvenile idiopathic arthritis; n, number of subjects; OR, odds ratio; TnT, transcription and translation of *in vitro* synthesized protein; WB, western immunoblot; #+ve, number positive in anti-NT5c1A assay.

**Supplemental Table 2:** Summary of ANA IIF on HEp-2 cell substrate

| Disease                 | N  | Anti-NT5c1A Positive (%) | ANA Patterns of Anti-NTc51A Positive Sera (*ICAP nomenclature)                                                                                                                                                                                                                                                                                                                                                                                                                                                                                                              | Other Myositis Related Antibodies |
|-------------------------|----|--------------------------|-----------------------------------------------------------------------------------------------------------------------------------------------------------------------------------------------------------------------------------------------------------------------------------------------------------------------------------------------------------------------------------------------------------------------------------------------------------------------------------------------------------------------------------------------------------------------------|-----------------------------------|
| sIBM                    | 43 | 21 (48.8)                | <p><b>Nuclear: 15/21 (71.4%)</b><br/>                     67% speckled (AC-2,4,5)<br/>                     33% homogenous (AC-1)<br/>                     5% CENP F-like (AC-14)<br/> <b>Cytoplasmic: 10/21 (47.6%)</b><br/>                     5% speckled (AC-19,20)<br/>                     20% Discrete Dots (AC-18)<br/> <b>Mitotic: 6/21 (28.6%)</b><br/>                     10% Chromosomal Envelope (AC-28)<br/>                     5% Centrosome (AC-24)<br/>                     5% Intercellular Bridge (AC-27)<br/> <b>Negative: 2/21 (9.5%) (AC-0)</b></p> | 5% anti-HMGCR<br>7% anti-SMN      |
| IIM                     | 3  | 1 (33.3)                 | <p><b>Nuclear</b><br/>                     100% homogenous (AC-1)<br/> <b>Cytoplasmic</b><br/>                     100% AMA (AC-21)</p>                                                                                                                                                                                                                                                                                                                                                                                                                                     | 33% anti-PL-7<br>33% anti-NXP2    |
| Statin-related myopathy | 4  | 1 (25.0)                 | <b>Negative:</b> 100% (AC-0)                                                                                                                                                                                                                                                                                                                                                                                                                                                                                                                                                | 50% anti-HMGCR<br>25% anti-Mi-2   |
| NMD                     | 13 | 2 (15.4)                 | <p><b>Nuclear:</b><br/>                     100% speckled (AC-2,4,5)<br/> <b>Cytoplasmic:</b><br/>                     50% speckled (AC-19,20)</p>                                                                                                                                                                                                                                                                                                                                                                                                                          | 8% anti-SAE<br>8% anti-EJ         |
| Healthy controls        | 8  | 2 (25.0)                 | <p><b>Nuclear:</b><br/>                     100% speckled (AC-2,4,5)<br/>                     50% homogenous (AC-1)<br/> <b>Cytoplasmic:</b><br/>                     100% speckled (AC-18,19,20)<br/>                     50% rods and rings (AC-23)</p>                                                                                                                                                                                                                                                                                                                   | None                              |

Note: Total % = >100 because some sera displayed more than one IIF staining pattern.

\* IIF ANA patterns include CMP cell staining and are referenced according to the standardized nomenclature of the International Consensus on Autoantibody Patterns (ICAP: <https://anapatterns.org/index.php>).

**Abbreviations:** AMA, antimitochondrial antibody; CENP-F, centromere protein F; EJ, glycyl-tRNA synthetase; HMGCR, HMG-CoA Reductase; IIF, indirect immunofluorescence IIM, inflammatory immune myopathies; ANA, anti-nuclear antibody; IBM, inclusion body myositis; Mi-2, subunit of nucleosome remodeling-histone deacetylase; NMD, neuromuscular/metabolic disorders; NXP-2, nuclear matrix protein 2; PL-7, threonyl-tRNA synthetase; SAE,

Small Ubiquitin-like Modifier Activating Enzymes; sIBM, sporadic inclusion body myositis; SMN, survival of motor neuron complex
